CORRECTION

Purine metabolism

R. W. E. WATTS

Volume 9 (1981)

p. 4, Fig. 1:

The correct Figure appears below

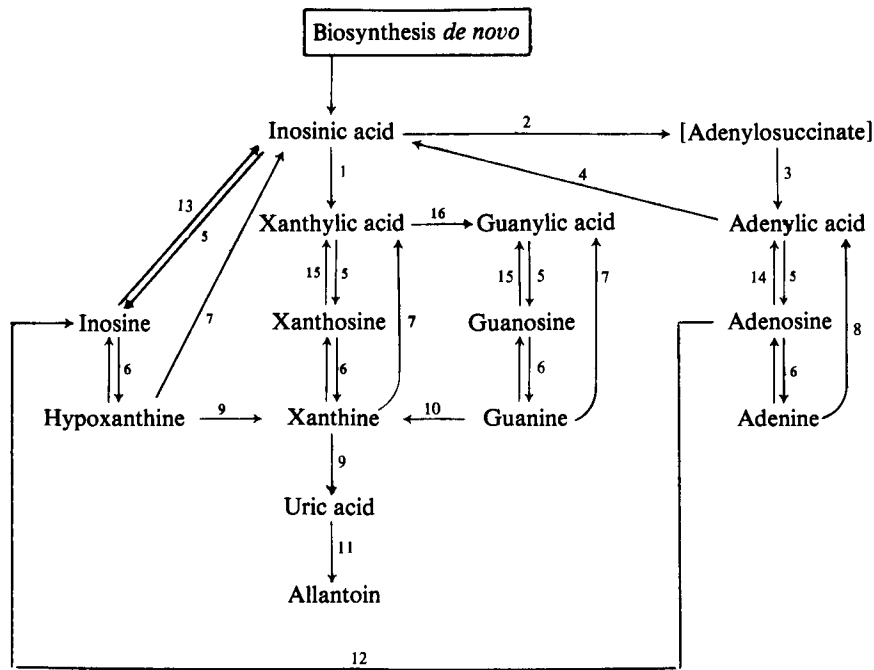

Fig. 1. Interconversion, conservation and degradation pathways of the purine nucleotides, nucleosides and bases

Key to enzymes: 1, IMP dehydrogenase (EC 1.2.1.14); 2, adenylosuccinate synthetase (EC 6.3.4.4); 3, adenylosuccinate lyase (EC 4.3.2.2); 4, AMP deaminase (EC 3.5.4.6); 5, 5'-nucleotidase (EC 3.1.3.5); 6, purine nucleoside phosphorylases (EC 2.4.2.1); 7, hypoxanthine phosphoribosyltransferase (EC 2.4.2.8); 8, adenine phosphoribosyltransferase (EC 2.4.2.7); 9, xanthine oxidase (EC 1.2.3.2); 10, guanine deaminase (EC 3.5.4.3); 11, urate oxidase (EC 1.7.3.3); 12, adenosine deaminase (EC 3.5.4.4); 13, inosine kinase (EC 2.7.1.73); 14, adenosine kinase (EC 2.7.1.20) [adenine deaminase (EC 3.5.4.2), which catalyses the deamination of adenine to hypoxanthine, occurs in some animal tissues but not in man]; 15, unclassified nucleoside kinase, 16, GMP synthetase (EC 6.3.4.1).
